# Supplementary material for: Long-term trends of surface ozone and its influencing factors at the Mt. Waliguan GAW station, China, Part 2: Variation mechanism and links to some climate indices
Source: Copernicus journal article supplement (doi:10.5194/acp-2017-483), 2017-06-06
Supplement: Supplementary file 1 [file acp-2017-483-supplement.pdf]

Supplement

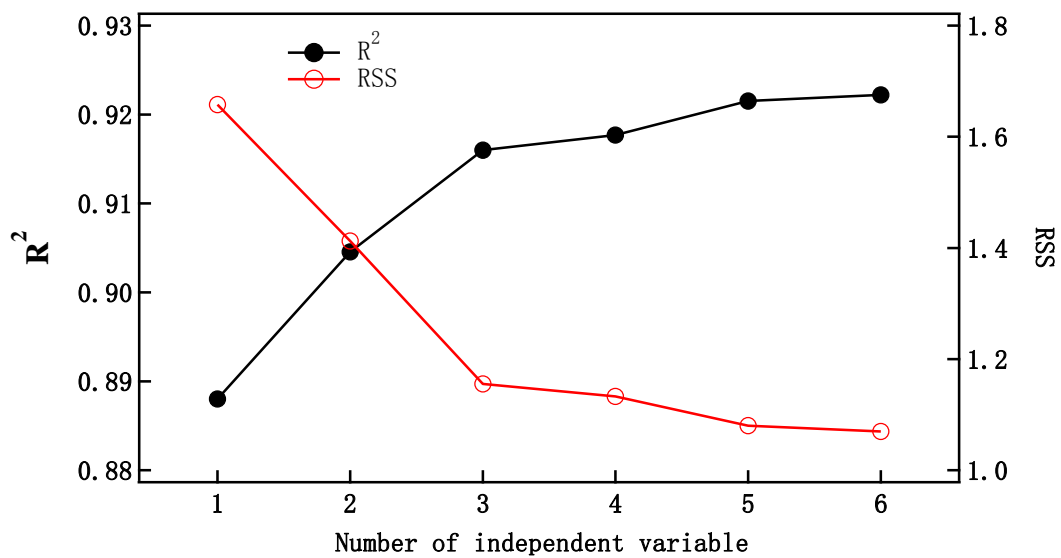

5 Figure S1 Changes of the coefficient of determination ( $R^2$ ) and residual sum of squares (RSS) after each step of the multivariate regression.
